# Supplementary material for: Development of an Fe3O4@Cu silicate based sensing platform for the electrochemical sensing of dopamine
Source: Royal Society of Chemistry journal article supplement (doi:10.1039/c8ra05885g), 2018-01-01
Supplement: c8ra05885g1.pdf [file c8ra05885g1.pdf]

**Development of Fe<sub>3</sub>O<sub>4</sub>@Cu silicate based sensing platform for the  
electrochemical sensing of dopamine**

Ashok Kumar Das<sup>a,†</sup>, Rambabu Kuchi<sup>b,c,†</sup>, Phuoc Cao Van<sup>b</sup>, Youngku Sohn<sup>a,\*</sup>, Jong-Ryul Jeong<sup>b,\*</sup>

<sup>a</sup>*Department of Chemistry, Chungnam National University, Daejeon 34134, South Korea.*

<sup>b</sup>*Department of Materials Science and Engineering, Chungnam National University, Daejeon  
34134, South Korea*

<sup>c</sup>*Department of Engineering Chemistry, SRKR Engineering College, Chinna Amiram,  
Bhimavaram 534204, India*

<sup>†</sup>These authors contributed equally to this work

\*Corresponding author: Tel: +82-42-821-6633, Fax: +82-42-822-5850

E-mail: youngkusohn@cnu.ac.kr, jrjeong@cnu.ac.kr.

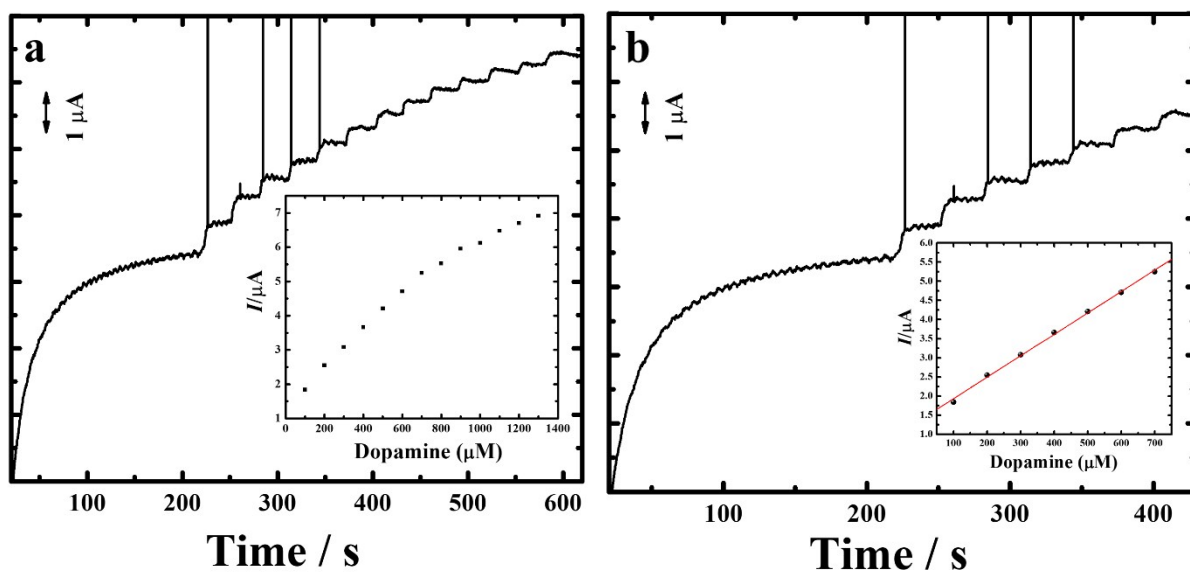

**Fig. S1** Amperometric response of CP-Fe<sub>3</sub>O<sub>4</sub>@Cu silicate core-shell urchin electrode for successive additions of (a) 100  $\mu\text{M}$  of DA up to 13 additions and (b) 100  $\mu\text{M}$  of DA up to 7 additions. The inset in (a) and (b) represents the relevant calibration plots.

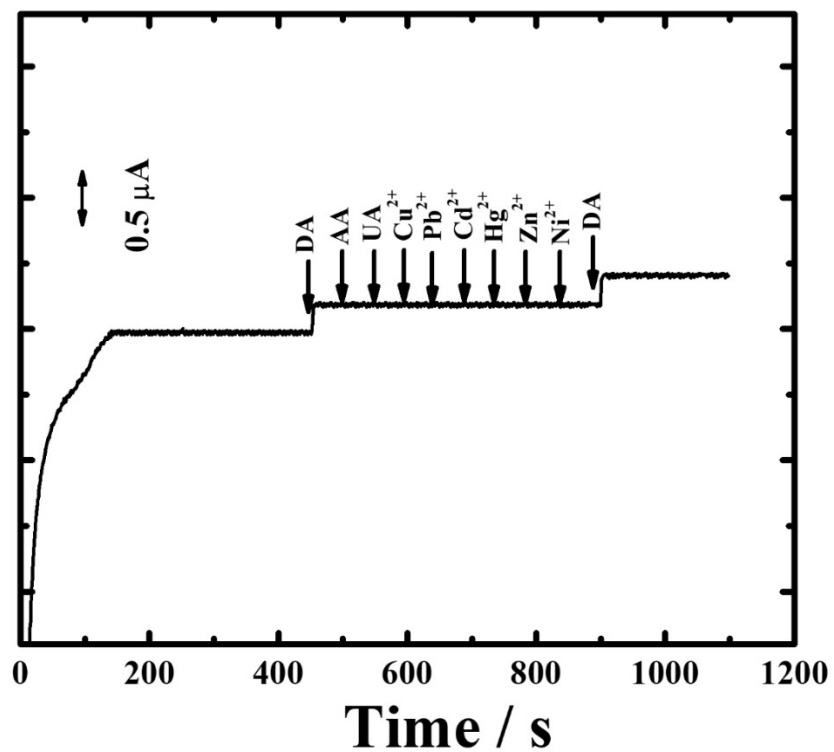

**Fig. S2** Amperometric response of CP-Fe<sub>3</sub>O<sub>4</sub>@Cu silicate core-shell urchin electrode in 0.1 M PBS for successive additions of 0.1 mM DA, AA, UA, Cu<sup>2+</sup>, Pb<sup>2+</sup>, Cd<sup>2+</sup>, Hg<sup>2+</sup>, Zn<sup>2+</sup> and Ni<sup>2+</sup> ions.

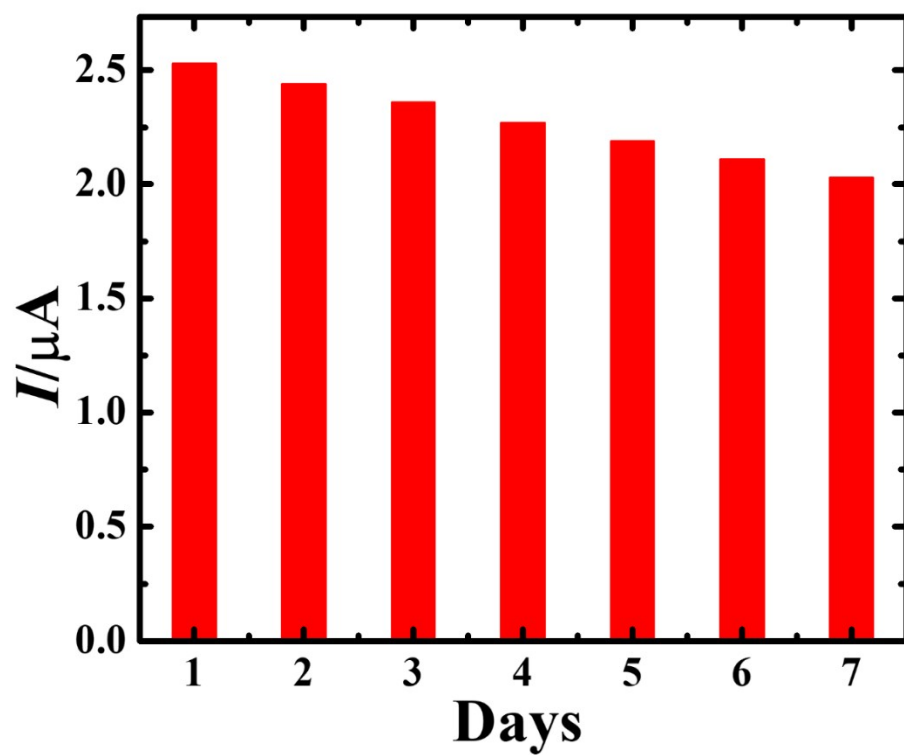

**Fig. S3** Storage stability response of CP-Fe<sub>3</sub>O<sub>4</sub>@Cu silicate core-shell urchin electrode measured in one day gap for one week in 0.1 M PBS containing 1.8 mM DA.

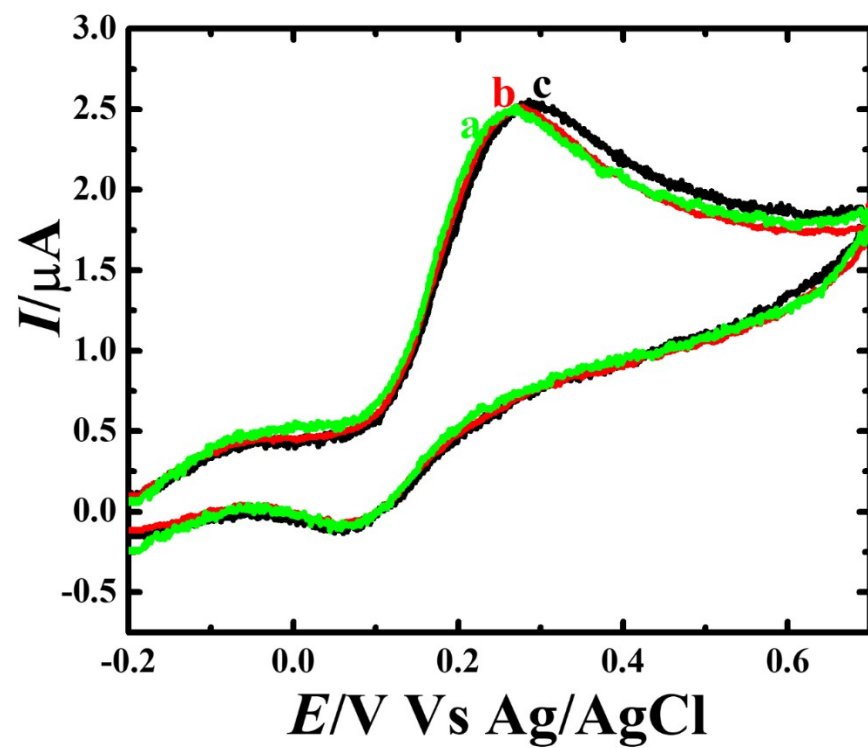

**Fig. S4** Voltammetric response of three CP-Fe<sub>3</sub>O<sub>4</sub>@Cu silicate core-shell urchin electrodes in 0.1 M PBS containing 1.8 mM DA at 50 mV/s scan rate.

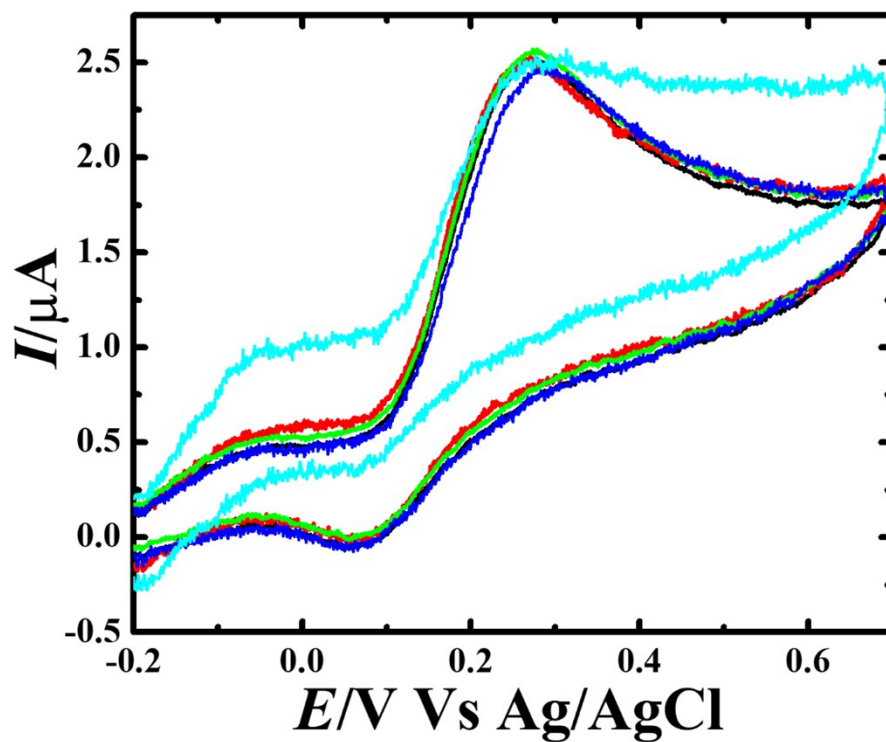

**Fig. S5** Results of repeatability of the CP-Fe<sub>3</sub>O<sub>4</sub>@Cu silicate core-shell urchin electrode for five different measurements in 0.1 M PBS containing 1.8 mM DA at 50 mV/s scan rate.

| Sample | Amount of DA Spiked ( $\mu\text{M}$ ) | Amount of DA estimated ( $\mu\text{M}$ ) | Recovery (%) | RSD (%) |
|--------|---------------------------------------|------------------------------------------|--------------|---------|
| 1      | 5                                     | 4.8                                      | 96           | 2.1     |
| 2      | 10                                    | 10.4                                     | 104          | 1.8     |
| 3      | 15                                    | 14.7                                     | 98           | 1.4     |

**Table S1.** Estimation of DA in real samples using CP- $\text{Fe}_3\text{O}_4@\text{Cu}$  silicate core-shell urchin electrode.
